# Supplementary material
Source: publisher figshare collection journal article supplement (https://tandf.figshare.com/articles/dataset/_/1088261)
Supplement: Supplementary file 1 [file 2]

**Supporting Information**

**Novel non-covalent interactions involved with the Al13M cluster (M = Li, Na, K, Cu, Ag, Au)**

Xiulin An, Hongying Zhuo, Wenkai Tian, Qingzhong Li*, Wenzuo Li, Jianbo Cheng

The Cartesian coordinates of Al13Li at the MP2/6-31++G(d,p) level

Al -2.24124900 -1.22640200 0.00000000

Al 0.02250900 -2.13197200 1.40770400

Al 2.26711500 -1.39742400 0.00000000

Al 0.02250900 -2.13197200 -1.40770400

Al -1.38736600 0.06423400 -2.27240500

Al -1.38736600 0.06423400 2.27240500

Al 1.43949700 0.03507300 2.29226600

Al 2.35524600 1.37819400 0.00000000

Al 0.02250900 2.31127600 -1.45056000

Al -2.24682900 1.50980000 0.00000000

Al 0.02250900 2.31127600 1.45056000

Al 1.43949700 0.03507300 -2.29226600

Al 0.04165800 0.10410200 0.00000000

Li -1.60437400 -4.01046800 0.00000000

The Cartesian coordinates of Al13Li-H3N at the MP2/6-31++G(d,p) level

Al -1.61895300 -1.62222100 0.00000000

Al 0.80994900 -1.62189500 1.40237100

Al 2.62209100 -0.09297000 0.00000000

Al 0.80994900 -1.62189500 -1.40237100

Al -1.31094400 -0.09374900 -2.27073200

Al -1.31094400 -0.09374900 2.27073200

Al 1.32020300 0.92480600 2.28668800

Al 1.66386300 2.51821400 0.00000000

Al -0.83248400 2.51778700 -1.44123100

Al -2.64049700 0.92434700 0.00000000

Al -0.83248400 2.51778700 1.44123100

Al 1.32020300 0.92480600 -2.28668800

Al 0.00001100 0.46702500 0.00000000

Li 0.00034000 -4.00834300 0.00000000

N -0.00002700 -6.02382900 0.00000000

H -0.46989500 -6.41187600 0.81368300

H 0.93944100 -6.41220900 0.00000000

H -0.46989500 -6.41187600 -0.81368300

The Cartesian coordinates of Al13Li-H2O at the MP2/6-31++G(d,p) level

Al -2.10595000 -0.91474000 0.00000000

Al 0.15500000 -1.81303000 1.40252000

Al 2.40420000 -1.06147000 0.00000000

Al 0.15500000 -1.81303000 -1.40252000

Al -1.25213000 0.38978000 -2.27085000

Al -1.25213000 0.38978000 2.27085000

Al 1.56941000 0.36451000 2.28735000

Al 2.47538000 1.71882000 0.00000000

Al 0.15500000 2.64006000 -1.44181000

Al -2.11288000 1.82707000 0.00000000

Al 0.15500000 2.64006000 1.44181000

Al 1.56941000 0.36451000 -2.28735000

Al 0.17222000 0.42696000 0.00000000

Li -1.48478000 -3.72825000 0.00000000

H -2.46267000 -6.00685000 0.77433000

H -2.46267000 -6.00685000 -0.77433000

O -2.21978000 -5.48403000 0.00000000

The Cartesian coordinates of Al13Li-C6H6 at the MP2/6-31++G(d,p) level

Al -0.74703500 -1.42048000 -0.78941800

Al -0.75727500 1.39273800 -0.81053600

Al 0.78206400 2.27872200 1.29796000

Al -0.73873100 0.00418100 1.63598600

Al 0.79911200 -2.26370700 1.33178600

Al 0.76856100 -0.02197300 -2.61916100

Al 1.78542500 2.27775100 -1.33903000

Al 3.39489400 1.44980600 0.80705400

Al 3.40574400 -1.42255500 0.82820000

Al 1.80267300 -2.29411000 -1.30536700

Al 3.38622400 -0.00464800 -1.66969300

Al 1.81656100 0.02110100 2.63719900

Al 1.33847900 -0.00015300 0.00024900

C -5.06885400 -1.39607700 0.13013000

C -5.04817800 -0.81248400 -1.14745600

C -5.03519400 0.58550900 -1.28090400

C -5.04306000 1.40032600 -0.13680100

C -5.06364100 0.81702800 1.14064200

C -5.07678700 -0.58129000 1.27413900

H -5.06255800 -2.47372800 0.23324600

H -5.02588900 -1.44039200 -2.02906600

H -5.00216000 1.03485000 -2.26526300

H -5.01680300 2.47772000 -0.23936500

H -5.05324900 1.44498700 2.02243600

H -5.07712400 -1.03110300 2.25887800

Li -3.07499500 -0.01571900 0.02422800

The Cartesian coordinates of Al13Li-HLi at the MP2/6-31++G(d,p) level

Al -2.17312700 -1.09604600 0.00000000

Al 0.08585000 -1.98758200 1.40215100

Al 2.33556600 -1.22047400 0.00000000

Al 0.08585000 -1.98758200 -1.40215100

Al -1.32088300 0.22235000 -2.26945500

Al -1.32088300 0.22235000 2.26945500

Al 1.49645800 0.19995800 2.28374200

Al 2.39602400 1.56110300 0.00000000

Al 0.08585000 2.47278100 -1.43387400

Al -2.18293900 1.65216600 0.00000000

Al 0.08585000 2.47278100 1.43387400

Al 1.49645800 0.19995800 -2.28374200

Al 0.10013100 0.25371600 0.00000000

Li -2.78025500 -7.04658900 0.00000000

H -2.18701400 -5.54243800 0.00000000

Li -1.56163300 -3.95634200 0.00000000

The Cartesian coordinates of Al13Na at the MP2/6-31++G(d,p) level

Al -2.16257700 -1.03201100 0.00000000

Al 0.10466200 -1.93531700 1.40909700

Al 2.35005500 -1.19423300 0.00000000

Al 0.10466200 -1.93531700 -1.40909700

Al -1.30812200 0.26311600 -2.27345500

Al -1.30812200 0.26311600 2.27345500

Al 1.51674000 0.23713500 2.28841500

Al 2.42693200 1.58884500 0.00000000

Al 0.10466200 2.51405700 -1.44324400

Al -2.16542800 1.70423500 0.00000000

Al 0.10466200 2.51405700 1.44324400

Al 1.51674000 0.23713500 -2.28841500

Al 0.11970800 0.30040100 0.00000000

Na -1.65994900 -4.16616800 0.00000000

The Cartesian coordinates of Al13Na-H3N at the MP2/6-31++G(d,p) level

Al 1.52448000 0.53614200 1.39551300

Al -0.29492600 -1.59995700 1.38137400

Al -2.47130800 -0.87651900 -0.14748200

Al -1.23519300 1.04372100 1.39585900

Al 0.47395200 2.58143200 -0.12453100

Al 1.99605000 -1.69818900 -0.14805400

Al -0.47662300 -2.58612600 -1.17183200

Al -1.56119400 -0.53852700 -2.75912800

Al 0.30219000 1.64922300 -2.74464600

Al 2.48585800 0.89204400 -1.14878600

Al 1.26515800 -1.05835800 -2.75945400

Al -2.00762200 1.71852000 -1.14824500

Al 0.00009600 0.00547800 -0.69773000

N 0.00317000 -0.06233600 6.58872600

H 0.71771600 -0.67673900 6.96857200

H -0.87771100 -0.38342900 6.98024200

H 0.17415500 0.85139200 6.99884000

Na -0.00439100 -0.02275800 4.15764800

The Cartesian coordinates of Al13Na-H2O at the MP2/6-31++G(d,p) level

Al -2.02016200 -0.70149600 0.00000000

Al 0.24238600 -1.59731100 1.40414400

Al 2.49073700 -0.84240000 0.00000000

Al 0.24238600 -1.59731100 -1.40414400

Al -1.16770500 0.60595100 -2.27146600

Al -1.16770500 0.60595100 2.27146600

Al 1.65296800 0.58356600 2.28499000

Al 2.55727500 1.94368900 0.00000000

Al 0.24238600 2.86034700 -1.43750600

Al -2.02702500 2.04073200 0.00000000

Al 0.24238600 2.86034700 1.43750600

Al 1.65296800 0.58356600 -2.28499000

Al 0.25688100 0.64237100 0.00000000

H -2.66109100 -6.55801400 0.76937600

H -2.66109100 -6.55801400 -0.76937600

O -2.42643300 -6.02268700 0.00000000

Na -1.53067800 -3.86786100 0.00000000

The Cartesian coordinates of Al13Na-C6H6 at the MP2/6-31++G(d,p) level

Al 0.44564200 1.62332200 -0.07403000

Al 0.56595600 -0.78995600 1.36284300

Al -0.58167100 -2.77011900 -0.17312200

Al -1.65629500 -0.23379100 -0.26689000

Al -0.77590200 1.12932500 -2.49492000

Al 2.81454200 0.23037500 0.13847400

Al 2.22005000 -2.52432900 0.03212200

Al 1.00778800 -3.07032600 -2.44238000

Al 0.88501600 -0.60323900 -3.91139500

Al 2.02489300 1.39844200 -2.30368700

Al 3.15638800 -1.17211100 -2.24509400

Al -1.39159300 -1.61997900 -2.61739600

Al 0.74079000 -0.71413000 -1.27429500

C -2.71405200 3.63632400 3.65286000

C -1.54680500 3.44423700 4.40756700

C -1.37667500 2.26501600 5.14873800

C -2.37318800 1.27727200 5.13419000

C -3.54045800 1.46933400 4.37954300

C -3.71061800 2.64860200 3.63836100

H -2.84957100 4.55049900 3.08807800

H -0.78127800 4.21018800 4.42567000

H -0.47948100 2.12064600 5.73799000

H -2.24571600 0.37072000 5.71293900

H -4.31355500 0.71080700 4.37570400

H -4.61551700 2.80094000 3.06301400

Na -1.46063400 1.39147000 2.44873300

The Cartesian coordinates of Al13Na-HLi at the MP2/6-31++G(d,p) level

Al -2.09077100 -0.88971800 0.00000000

Al 0.16915600 -1.78000100 1.40234200

Al 2.41889400 -1.01106600 0.00000000

Al 0.16915600 -1.78000100 -1.40234200

Al -1.23922300 0.42970300 -2.26991200

Al -1.23922300 0.42970300 2.26991200

Al 1.57732500 0.40982900 2.28165500

Al 2.47588000 1.77557100 0.00000000

Al 0.16915600 2.68419300 -1.43132800

Al -2.09959200 1.85825900 0.00000000

Al 0.16915600 2.68419300 1.43132800

Al 1.57732500 0.40982900 -2.28165500

Al 0.18192100 0.46160300 0.00000000

Na -1.61982300 -4.11069100 0.00000000

Li -2.97149600 -7.53968200 0.00000000

H -2.37655600 -6.03059900 0.00000000

The Cartesian coordinates of Al13K at the MP2/6-31++G(d,p) level

Al 1.52601600 1.22797000 1.04541800

Al 1.52586200 0.29173700 -1.58635300

Al -0.00929600 -1.99510600 -1.69909400

Al 1.52610000 -1.51934300 0.54032700

Al -0.00898100 -0.47381600 2.57730900

Al -0.00946800 2.46901300 -0.87837000

Al -1.01682800 0.47675500 -2.59329400

Al -2.62512900 -1.26241100 -1.07474800

Al -2.62492500 -0.29991400 1.63084500

Al -1.01651800 2.00747800 1.70962600

Al -2.62524200 1.56196300 -0.55549100

Al -1.01635100 -2.48431800 0.88381400

Al -0.56855900 0.00000000 -0.00000100

K 4.75069200 -0.00000600 0.00000900

The Cartesian coordinates of Al13K-H3N at the MP2/6-31++G(d,p) level

Al -1.13333100 -0.10331300 -1.60836500

Al -1.13629700 1.43871800 0.71892300

Al 0.40728200 0.16052400 2.61433000

Al -1.12996300 -1.34777000 0.89071100

Al 0.41203100 -2.34526200 -1.16747900

Al 0.40184600 2.18275500 -1.44663200

Al 1.41014300 2.35936200 1.17394200

Al 3.02431400 0.10697000 1.65019200

Al 3.02731800 -1.47523700 -0.73773800

Al 1.41493600 -0.16048000 -2.62909900

Al 3.02087700 1.38386500 -0.91401200

Al 1.42041600 -2.19409000 1.45468600

Al 0.96456500 0.00058800 -0.00005200

N -7.27388200 0.01319500 -0.00118200

H -7.65851900 0.79769400 -0.51864200

H -7.66747400 0.07493600 0.93285100

H -7.67560500 -0.82065000 -0.41886400

K -4.39131600 -0.01213400 0.00108500

The Cartesian coordinates of Al13K-H2O at the MP2/6-31++G(d,p) level

Al -1.91620800 -0.47355700 0.00000000

Al 0.33469000 -1.35742400 1.39592700

Al 2.58588900 -0.58764400 0.00000000

Al 0.33469000 -1.35742400 -1.39592700

Al -1.07151900 0.84921400 -2.26857800

Al -1.07151900 0.84921400 2.26857800

Al 1.74230900 0.82712900 2.28127800

Al 2.64376300 2.20108500 0.00000000

Al 0.33469000 3.10835900 -1.43235200

Al -1.93563100 2.27185800 0.00000000

Al 0.33469000 3.10835900 1.43235200

Al 1.74230900 0.82712900 -2.28127800

Al 0.35123900 0.88909700 0.00000000

H -2.86440600 -7.15210700 0.76543600

H -2.86440600 -7.15210700 -0.76543600

O -2.63762700 -6.60906100 0.00000000

K -1.60485700 -4.09702400 0.00000000

The Cartesian coordinates of Al13K-C6H6 at the MP2/6-31++G(d,p) level

Al 0.86548700 -1.36130900 0.12563400

Al -1.60172900 -0.05526900 0.13906700

Al -1.38969200 2.22633800 -1.39551000

Al 0.76290400 1.42854400 0.13183500

Al 2.61966700 0.10272300 -1.41777100

Al -1.22413300 -2.30779100 -1.40542200

Al -2.63547200 -0.08726500 -2.40391600

Al -0.88930900 1.41415800 -4.01730900

Al 1.64402600 0.07283200 -4.03129000

Al 1.39723000 -2.22287900 -2.42638400

Al -0.78439200 -1.45026000 -4.02342300

Al 1.23030500 2.33742600 -2.41650900

Al -0.00053300 0.00819200 -1.96541000

C 1.23163700 -0.68732700 6.24466600

C 0.04323100 -1.43002500 6.26023400

C -1.19416000 -0.77305000 6.22210100

C -1.24344400 0.62692700 6.26632200

C -0.05573100 1.37069400 6.25072700

C 1.18108200 0.71257100 6.28864100

H 2.18730000 -1.19536800 6.28831700

H 0.08140200 -2.51263200 6.25602500

H -2.11215600 -1.34740700 6.24801600

H -2.20024900 1.13489800 6.26676100

H -0.09448400 2.45210800 6.29908000

H 2.09939300 1.28698300 6.30616900

K 0.01770700 -0.00568700 3.34330500

The Cartesian coordinates of Al13K-HLi at the MP2/6-31++G(d,p) level

Al -1.61130900 -1.34816700 0.00000000

Al 0.80594900 -1.34797800 1.39562400

Al 2.61801100 0.19882600 0.00000000

Al 0.80594900 -1.34797800 -1.39562400

Al -1.30897500 0.19853900 -2.26727000

Al -1.30897500 0.19853900 2.26727000

Al 1.31581100 1.20516800 2.27908700

Al 1.64917100 2.81490200 0.00000000

Al -0.82488600 2.81471400 -1.42836200

Al -2.63172200 1.20467700 0.00000000

Al -0.82488600 2.81471400 1.42836200

Al 1.31581100 1.20516800 -2.27908700

Al -0.00000800 0.75059100 0.00000000

Li -0.00019200 -8.76585600 0.00000000

H -0.00020300 -7.13961100 0.00000000

K 0.00008200 -4.64553300 0.00000000

The Cartesian coordinates of Al13Cu at the MP2/aug-cc-pVDZ level

Al -2.23558400 -0.70602100 0.00000000

Al 0.21639300 -1.75467800 1.53966900

Al 2.43839100 -1.09567700 0.00000000

Al 0.21639300 -1.75467800 -1.53966900

Al -1.24785200 0.48080400 -2.31471300

Al -1.24785200 0.48080400 2.31471300

Al 1.67497000 0.46424000 2.35125300

Al 2.64172800 1.70481200 0.00000000

Al 0.21639300 2.74206600 -1.52294600

Al -2.06944300 2.06563500 0.00000000

Al 0.21639300 2.74206600 1.52294600

Al 1.67497000 0.46424000 -2.35125300

Al 0.21228200 0.49634500 0.00000000

Cu -1.21356500 -2.83756800 0.00000000

The Cartesian coordinates of Al13Cu-H3N at the MP2/aug-cc-pVDZ level

Al -2.03951900 -0.54515300 0.00000000

Al 0.30173900 -1.49579600 1.45890400

Al 2.57994900 -0.75509500 0.00000000

Al 0.30173900 -1.49579600 -1.45890400

Al -1.13705200 0.75414600 -2.31616700

Al -1.13705200 0.75414600 2.31616700

Al 1.75128100 0.72486600 2.33813600

Al 2.68814900 2.05624900 0.00000000

Al 0.30173900 3.02522700 -1.48703100

Al -2.00096400 2.24841000 0.00000000

Al 0.30173900 3.02522700 1.48703100

Al 1.75128100 0.72486600 -2.33813600

Al 0.32284400 0.79508200 0.00000000

N -1.86632000 -4.59633700 0.00000000

H -2.45091600 -4.77848400 0.81946300

H -1.13584700 -5.31247600 0.00000000

H -2.45091600 -4.77848400 -0.81946300

Cu -1.12808400 -2.77824500 0.00000000

The Cartesian coordinates of Al13Cu-H2O at the MP2/aug-cc-pVDZ level

Al 1.26035300 1.50993800 -0.81516900

Al 1.26034500 -1.42586200 -0.95467000

Al -0.23313100 -2.37664100 1.21786800

Al 1.29677200 -0.07932700 1.66934300

Al -0.23311700 2.25045500 1.43772700

Al -0.30487600 0.12733700 -2.67979800

Al -1.35453500 -2.27461900 -1.44741900

Al -2.88715300 -1.53343900 0.83447900

Al -2.88713700 1.44741900 0.97611800

Al -1.35450600 2.40162500 -1.22522800

Al -2.93638500 0.07985000 -1.68021000

Al -1.28406200 -0.12884400 2.71154300

Al -0.84454800 -0.00011600 0.00251400

H 5.38118500 -0.79113600 0.39376500

H 5.38117600 0.75037700 0.46682000

O 4.97780200 -0.00017800 0.00396800

Cu 2.96348100 0.00245100 -0.05188300

The Cartesian coordinates of Al13Cu-C6H6 at the MP2/aug-cc-pVDZ level

Al -0.43289400 1.65333400 0.62258400

Al 1.64827400 -0.45172800 0.62261400

Al 0.68001200 -2.59669300 -0.91551100

Al -1.21531200 -1.20164800 0.62257900

Al -2.58877600 0.70946700 -0.91543500

Al 1.90883900 1.88722100 -0.91550800

Al 2.58626500 -0.70875500 -1.97752000

Al 0.42638600 -1.62825700 -3.57310000

Al -1.62332600 0.44489300 -3.57308200

Al -0.67932300 2.59414700 -1.97749100

Al 1.19692500 1.18342300 -3.57310500

Al -1.90694900 -1.88534900 -1.97750100

Al 0.00001500 -0.00001100 -1.47166400

C -0.99780500 1.00782100 4.23976400

C 0.37569100 1.36759200 4.23999400

C 1.37166000 0.36021700 4.24001300

C 0.99648400 -1.00912900 4.23987000

C -0.37386300 -1.36804500 4.23972600

C -1.37214800 -0.35841000 4.23963000

H -1.76563000 1.78393800 4.19723500

H 0.66449400 2.42044700 4.19758900

H 2.42772300 0.63710300 4.19762500

H 1.76391000 -1.78563400 4.19742700

H -0.66211300 -2.42105500 4.19713600

H -2.42833100 -0.63476000 4.19698900

Cu -0.00006700 -0.00003100 2.38654600

The Cartesian coordinates of Al13Cu-HLi at the MP2/aug-cc-pVDZ level

Al -1.49202300 0.57809100 -1.48484100

Al -1.49200900 0.57646500 1.48546300

Al 0.25553700 -1.40734500 2.32041000

Al -1.33825700 -1.86009900 -0.00100900

Al 0.25551500 -1.40479300 -2.32193700

Al -0.16470700 2.60001500 0.00140600

Al 0.99932100 1.41094100 2.33440600

Al 2.83368900 -0.59081800 1.49913100

Al 2.83367500 -0.58917400 -1.49977500

Al 0.99929400 1.41351100 -2.33287300

Al 2.55392600 1.89255700 0.00099700

Al 1.41622400 -2.60554500 -0.00141700

Al 0.68045400 -0.00560900 0.00002000

Li -3.64982600 2.09795900 0.00116000

H -4.57537400 0.45900500 0.00027500

Cu -3.20356800 -0.23653200 -0.00012000

The Cartesian coordinates of Al13Ag at the MP2/aug-cc-pVDZ level

Al 1.20974700 1.62710400 -0.75539800

Al 1.20974700 -1.46784700 -1.03126800

Al -0.25633200 -2.42921700 1.12786100

Al 1.20969500 -0.15926600 1.78682400

Al -0.25633300 2.19144400 1.53971800

Al -0.25612200 0.23777900 -2.66762200

Al -1.40138300 -2.22011300 -1.55977400

Al -2.92074100 -1.58690600 0.73690700

Al -2.92074300 1.43155800 1.00595200

Al -1.40137900 2.46098500 -1.14253400

Al -2.92048100 0.15538700 -1.74326600

Al -1.40118700 -0.24089700 2.70259600

Al -0.83816200 -0.00001700 0.00010600

Ag 3.02697400 0.00000200 -0.00002900

The Cartesian coordinates of Al13Ag-H3N at the MP2/aug-cc-pVDZ level

Al -1.95820500 -0.23545900 0.00000000

Al 0.42955200 -1.21789000 1.49070600

Al 2.68779300 -0.50352300 0.00000000

Al 0.42955200 -1.21789000 -1.49070600

Al -1.02595800 1.02448900 -2.31853100

Al -1.02595800 1.02448900 2.31853100

Al 1.87252800 1.00324900 2.33815800

Al 2.80790500 2.31843600 0.00000000

Al 0.42955200 3.29700100 -1.48483000

Al -1.87266500 2.54419700 0.00000000

Al 0.42955200 3.29700100 1.48483000

Al 1.87252800 1.00324900 -2.33815800

Al 0.43042800 1.04615300 0.00000000

N -1.95477300 -4.75098800 0.00000000

H -2.53805900 -4.92388300 0.82034900

H -1.22404700 -5.46452000 0.00000000

H -2.53805900 -4.92388300 -0.82034900

Ag -1.09792000 -2.66843200 0.00000000

The Cartesian coordinates of Al13Ag-H2O at the MP2/aug-cc-pVDZ level

Al 0.95101000 1.50690500 -0.89841000

Al 0.95099400 -1.50476100 -0.90202400

Al -0.51928100 -2.32017400 1.33131600

Al 0.98841200 -0.00206300 1.71661200

Al -0.51926000 2.31697500 1.33687800

Al -0.58551100 0.00321700 -2.68241200

Al -1.66235900 -2.34000800 -1.33951900

Al -3.18418400 -1.49302000 0.90202300

Al -3.18416800 1.49087400 0.90560300

Al -1.66233200 2.34322500 -1.33390400

Al -3.22868200 0.00203100 -1.68135700

Al -1.59713100 -0.00325800 2.71732300

Al -1.11660100 -0.00000200 0.00488300

H 5.58913000 -0.76812300 0.48751900

H 5.58910600 0.76716200 0.48911500

O 5.19207200 -0.00003200 0.05072800

Ag 2.85283800 0.00004300 -0.05071500

The Cartesian coordinates of Al13Ag-C6H6 at the MP2/aug-cc-pVDZ level

Al 1.54446200 0.83362500 0.33261300

Al -0.04806200 -1.75823200 0.31182900

Al -2.35622200 -1.26631300 -1.19370400

Al -1.49649000 0.91681400 0.33308500

Al 0.07335500 2.68787400 -1.16199300

Al 2.28309700 -1.39322300 -1.19439800

Al -0.07357500 -2.67616700 -2.29863800

Al -1.50124900 -0.78225300 -3.85415100

Al 0.04695000 1.73748700 -3.83395600

Al 2.37043800 1.30151100 -2.26674300

Al 1.45507700 -0.86313000 -3.85459400

Al -2.29643100 1.42918700 -2.26603800

Al 0.00010800 0.01389200 -1.74254800

C 0.73999800 1.16869600 4.57549100

C 1.41354400 -0.07534800 4.56560300

C 0.67329800 -1.28011300 4.55589000

C -0.74089700 -1.24141900 4.55609700

C -1.41411900 0.00210600 4.56603100

C -0.67350500 1.20743200 4.57574300

H 1.31213600 2.10018700 4.56604300

H 2.50621700 -0.10528700 4.54844000

H 1.19389400 -2.24108800 4.53121600

H -1.31329900 -2.17247400 4.53162200

H -2.50679200 0.03201800 4.54919400

H -1.19379800 2.16884500 4.56645300

Ag -0.00015400 -0.01753700 2.19782900

The Cartesian coordinates of Al13Ag-HLi at the MP2/aug-cc-pVDZ level

Al 1.16208800 0.66250300 1.50770600

Al 1.16203800 0.66273200 -1.50762300

Al -0.50730300 -1.39492300 -2.32330400

Al 1.06928500 -1.83508700 -0.00016600

Al -0.50722200 -1.39529300 2.32308400

Al -0.21921700 2.62430600 0.00017600

Al -1.35854900 1.39827000 -2.33402100

Al -3.12080200 -0.66025400 -1.49141500

Al -3.12075000 -0.66048900 1.49140500

Al -1.35847200 1.39794600 2.33425100

Al -2.92423300 1.82432400 0.00014300

Al -1.65222300 -2.62656600 -0.00017300

Al -0.96384200 -0.00733800 -0.00001800

Li 3.34111800 2.32784200 0.00021400

H 4.52288200 0.81331300 0.00007000

Ag 3.10347600 -0.16316000 -0.00002700

The Cartesian coordinates of Al13Au at the MP2/aug-cc-pVDZ level

Al -2.11351500 -0.03666800 0.00000000

Al 0.51071600 -1.20653500 1.65884000

Al 2.66716100 -0.58954200 0.00000000

Al 0.51071600 -1.20653500 -1.65884000

Al -0.99918600 1.04489600 -2.31757100

Al -0.99918600 1.04489600 2.31757100

Al 1.95193200 1.03657700 2.35689900

Al 2.89585200 2.22020100 0.00000000

Al 0.51071600 3.28349000 -1.50770100

Al -1.77660100 2.69874800 0.00000000

Al 0.51071600 3.28349000 1.50770100

Al 1.95193200 1.03657700 -2.35689900

Al 0.43934900 0.98553500 0.00000000

Au -0.99731400 -2.23717300 0.00000000

The Cartesian coordinates of Al13Au-H3N at the MP2/aug-cc-pVDZ level

Al -1.87679600 0.07657300 0.00000000

Al 0.56318500 -0.93943000 1.52594600

Al 2.80812200 -0.23022200 0.00000000

Al 0.56318500 -0.93943000 -1.52594600

Al -0.90417800 1.31554600 -2.32166900

Al -0.90417800 1.31554600 2.32166900

Al 1.99988100 1.29278800 2.33702000

Al 2.92357400 2.58679800 0.00000000

Al 0.56318500 3.56965900 -1.47618400

Al -1.73691800 2.84877900 0.00000000

Al 0.56318500 3.56965900 1.47618400

Al 1.99988100 1.29278800 -2.33702000

Al 0.54585600 1.31084300 0.00000000

N -1.81715000 -4.36334000 0.00000000

H -2.39983400 -4.52626100 0.82313500

H -1.08374600 -5.07449200 0.00000000

H -2.39983400 -4.52626100 -0.82313500

Au -0.93418100 -2.24352200 0.00000000

The Cartesian coordinates of Al13Au-H2O at the MP2/aug-cc-pVDZ level

Al -0.65524100 -1.57322500 -0.93578200

Al -0.65524300 1.57654700 -0.93015600

Al 0.80151400 2.31824100 1.34189600

Al -0.68597100 -0.00322200 1.80364600

Al 0.80150600 -2.32301700 1.33359700

Al 0.85625900 0.00478800 -2.68216200

Al 1.97302300 2.34785800 -1.33501300

Al 3.45836600 1.48961900 0.90060400

Al 3.45837400 -1.49281100 0.89529800

Al 1.97305400 -2.34306800 -1.34339200

Al 3.49516100 0.00301000 -1.68405900

Al 1.92070200 -0.00487200 2.72159400

Al 1.36882200 -0.00001300 0.00531500

H -5.21317600 0.76464600 0.55562000

H -5.21316000 -0.76677000 0.55265200

Au -2.35217000 0.00006300 -0.03418200

O -4.89830400 -0.00008400 0.05051000

The Cartesian coordinates of Al13Au-C6H6 at the MP2/aug-cc-pVDZ level

Al 0.00000000 1.84421200 0.13075000

Al 1.59713400 -0.92210600 0.13075000

Al 0.00000000 -2.68542200 -1.35259300

Al -1.59713400 -0.92210600 0.13075000

Al -2.32564400 1.34271100 -1.35259300

Al 2.32564400 1.34271100 -1.35259300

Al 2.33782800 -1.34974500 -2.48562600

Al 0.00000000 -1.70841600 -4.01077800

Al -1.47953200 0.85420800 -4.01077800

Al 0.00000000 2.69949100 -2.48562600

Al 1.47953200 0.85420800 -4.01077800

Al -2.33782800 -1.34974500 -2.48562600

Al 0.00000000 0.00000000 -1.88781300

C -0.70649000 1.22312000 4.39531600

C 0.70649000 1.22312000 4.39531600

C 1.41249800 0.00027800 4.39531600

C 0.70600800 -1.22339800 4.39531600

C -0.70600800 -1.22339800 4.39531600

C -1.41249800 0.00027800 4.39531600

H -1.25350700 2.17005600 4.38100400

H 1.25350700 2.17005600 4.38100400

H 2.50607700 0.00054100 4.38100400

H 1.25257000 -2.17059700 4.38100400

H -1.25257000 -2.17059700 4.38100400

H -2.50607700 0.00054100 4.38100400

Au 0.00000000 0.00000000 1.78526300

The Cartesian coordinates of Al13Au-HLi at the MP2/aug-cc-pVDZ level

Al -0.79178500 0.69734200 -1.52176200

Al -0.79203400 0.68641100 1.52677100

Al 0.86846400 -1.39681300 2.32186000

Al -0.71468300 -1.82082300 -0.00641500

Al 0.86771300 -1.38051600 -2.33117100

Al 0.61724900 2.64015300 0.00978300

Al 1.74227600 1.38295700 2.33762800

Al 3.47819900 -0.68375200 1.47939100

Al 3.47791500 -0.67334400 -1.48487100

Al 1.74188200 1.40004600 -2.32802400

Al 3.30233200 1.79393400 0.00594200

Al 1.99483200 -2.62770600 -0.00904700

Al 1.32392100 -0.00389600 0.00003500

Au -2.64838700 -0.09728000 -0.00033700

Li -3.02827500 2.32682100 0.00778300

H -4.20427100 0.52277100 0.00174100
